# Supplementary material
Source: publisher site journal article supplement (https://www.spandidos-publications.com/4105/downloadSupplementary)
Supplement: Supplementary file 1 [file downloadSupplementary]

Table SI. Patient characteristics.

| Patient no. | Sex | Age, years | Histology        | Clinical stage           | Surgery                                          | Prior chemotherapy             | Response to prior chemotherapy |
|-------------|-----|------------|------------------|--------------------------|--------------------------------------------------|--------------------------------|--------------------------------|
| 1           | F   | 73         | Squamous         | IVb                      | No                                               | No                             |                                |
| 2           | F   | 68         | Squamous         | IVb                      | No                                               | No                             |                                |
| 3           | M   | 50         | Squamous         | IVb                      | No                                               | No                             |                                |
| 4           | M   | 55         | Squamous         | IVb                      | No                                               | No                             |                                |
| 5           | M   | 64         | Squamous         | Postoperative recurrence | Complete thymectomy followed by local recurrence | CBDCA + nabPTX                 | Adjuvant chemotherapy provided |
| 6           | F   | 66         | Undifferentiated | Postoperative recurrence | Complete thymectomy followed by local recurrence | No                             |                                |
| 7           | M   | 41         | Squamous         | IVa                      | No                                               | No                             |                                |
| 8           | F   | 69         | Undifferentiated | IVa                      | No                                               | CBDCA + PTX + Bev              | PR                             |
| 9           | M   | 68         | Squamous         | IVb                      | No                                               | No                             |                                |
| 10          | M   | 72         | Squamous         | III                      | No <sup>a</sup>                                  | CBDCA + PTX, CDDP + CPT11, DTX | PR                             |
| 11          | M   | 64         | Neuroendocrine   | III                      | No <sup>a</sup>                                  | No                             |                                |
| 12          | F   | 54         | Squamous         | IVa                      | No                                               | CDDP + CPT11                   | PR                             |

<sup>a</sup>A thoracic surgeon rejected these stage III patients for surgery as the tumors had infiltrated major vessels. F, female; M, male; Bev, bevacizumab; CBDCA, carboplatin; CDDP, cisplatin; CPT11, irinotecan; DTX, docetaxel; nabPTX, nanoparticle albumin-bound paclitaxel; PR, partial response.
